# Supplementary material for: Cell-to-cell variability in troponin I phosphorylation in a porcine model of pacing-induced heart failure
Source: Springer Nature journal article supplement (doi:10.1007/s00395-012-0244-x), 2012-01-11
Supplement: MOESM1 [file 8394500]

## ONLINE RESOURCE 1

### Basic Research in Cardiology

Dániel Czuriga<sup>a</sup>, Attila Tóth<sup>a</sup>, Enikő T. Pásztor<sup>a</sup>, Ágnes Balogh<sup>a</sup>, Andrea Bodnár<sup>b</sup>, Enikő Nizsalóczki<sup>b</sup>, Vincenzo Lionetti<sup>c,d</sup>, Fabio A. Recchia<sup>c,d,e</sup>, István Czuriga<sup>a</sup>, István Édes<sup>a</sup>,  
Zoltán Papp<sup>a\*</sup>

### CELL-TO-CELL VARIABILITY IN TROPONIN I PHOSPHORYLATION IN A PORCINE MODEL OF PACING-INDUCED HEART FAILURE

<sup>a</sup>Division of Clinical Physiology, Research Center for Molecular Medicine, Institute of Cardiology, University of Debrecen, Medical and Health Science Center, Hungary

<sup>b</sup>HAS-UD Cell Biology and Signaling Research Group, Department of Biophysics and Cell Biology, University of Debrecen, Medical and Health Science Center, Hungary

<sup>c</sup>Sector of Medicine, Scuola Superiore Sant'Anna, Pisa, Italy

<sup>d</sup>Fondazione CNR-Regione Toscana "G. Monasterio", Pisa, Italy

<sup>e</sup>Department of Physiology, New York Medical College, Valhalla, New York, USA

#### **\*Corresponding author:**

#### **Zoltán Papp**

Division of Clinical Physiology, Research Center for Molecular Medicine, Institute of Cardiology

University of Debrecen, Medical and Health Science Center, Faculty of Medicine

Móricz Zs. krt. 22.

H-4032 Debrecen, Hungary

Tel./Fax: +36-52-255928

E-mail: [pappz@med.unideb.hu](mailto:pappz@med.unideb.hu)

## HF pacing

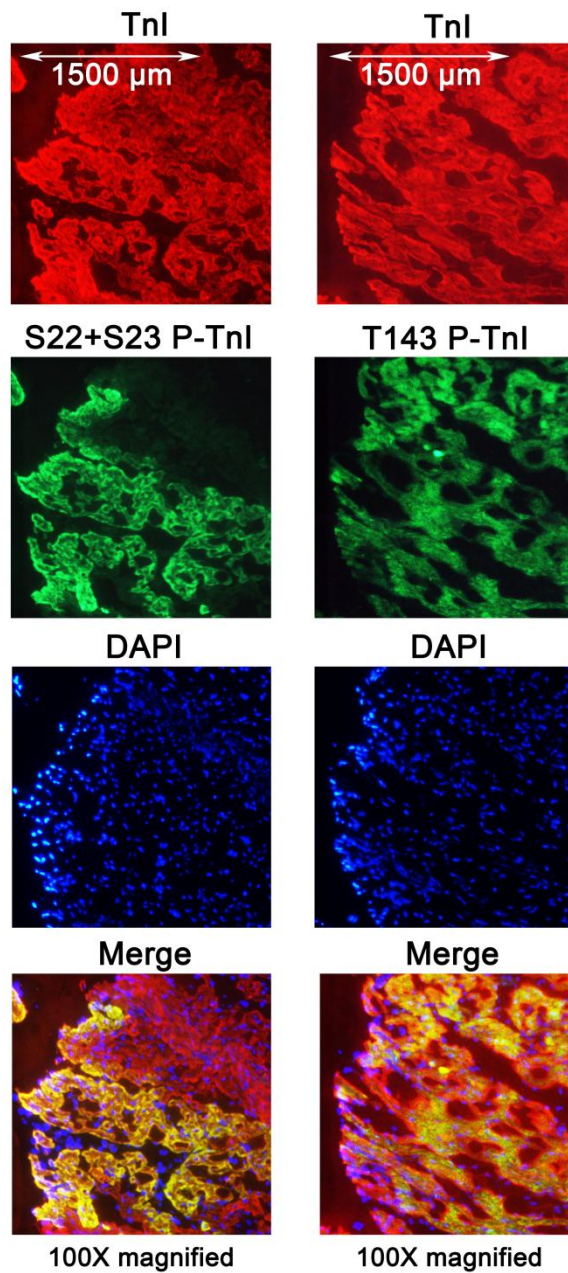

*Online Resource 1. Comparative immunohistochemistry for PKA- and PKC-specific TnI phosphorylation at the pacing site of HF animals.* PKA specific labeling of TnI phosphorylation resulted in a more heterogeneous intensity pattern in a tissue sample from the HF pacing site when compared to the adjacent tissue section from the same myocardial region labeled for a PKC-specific phosphorylation site of TnI. (Arrangements as in Fig. 1a. This assay gave identical results in four different HF hearts.)
